# Supplementary material for: Highly cross-linked fluorescent poly(cyclotriphosphazene-co-curcumin) microspheres for the selective detection of picric acid in solution phase
Source: Royal Society of Chemistry journal article supplement (doi:10.1039/c4ta06828a), 2015-01-01
Supplement: c4ta06828a1.pdf [file c4ta06828a1.pdf]

Electronic Supplementary Information

**Highly cross-linked fluorescent poly(cyclotriphosphazene-co-curcumin)  
microspheres for selective detection of picric acid in solution phase**

Wei Wei, Rongjie Lu, Shuyuan Tang and Xiaoya Liu\*

The Key Laboratory of Food Colloids and Biotechnology, Ministry of Education,  
School of Chemical and Material Engineering, Jiangnan University, Wuxi, Jiangsu  
214122, P. R. China

\*Corresponding author: Fax: 86-510-85917763; Tel: 86-510-85917763; E-mail:

[lxy@jiangnan.edu.cn](mailto:lxy@jiangnan.edu.cn) (Prof. Liu)

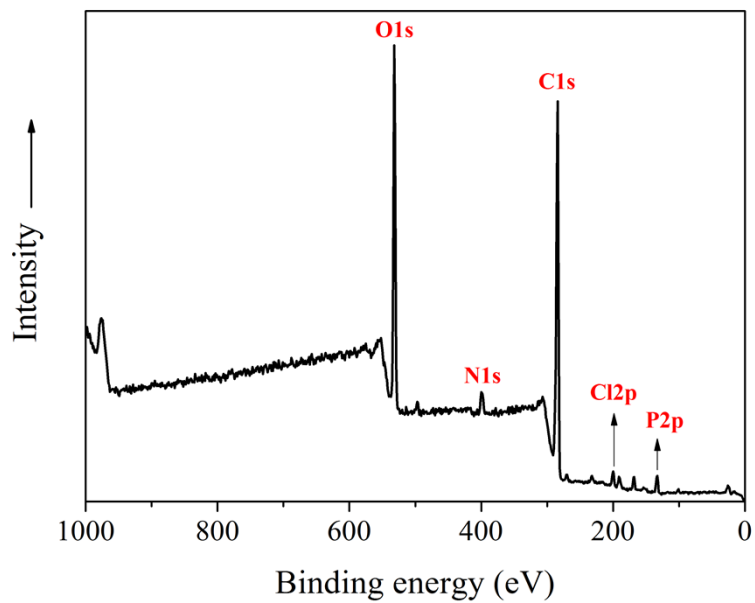

**Fig. S1** XPS spectrum of the as-prepared PCPC-MS.

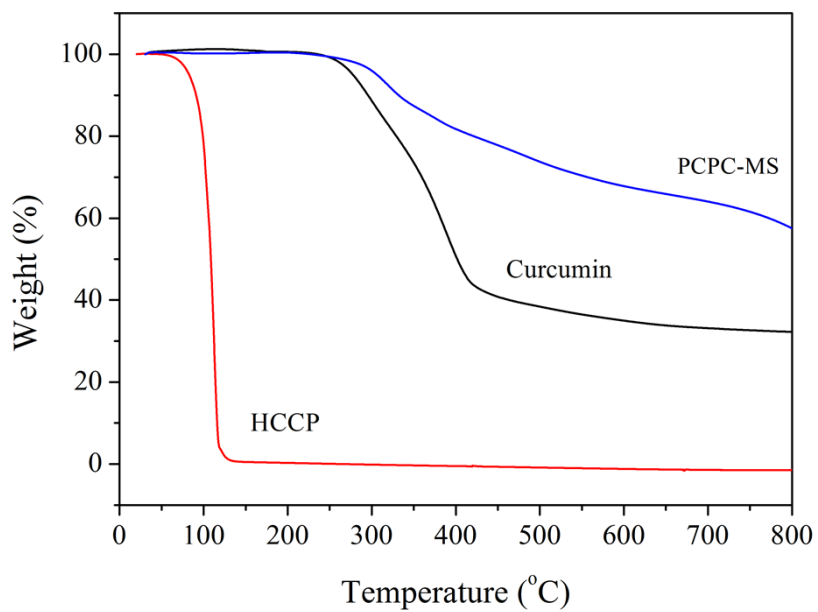

**Fig. S2** TGA curves of HCCP, curcumin, and PCPC-MS.

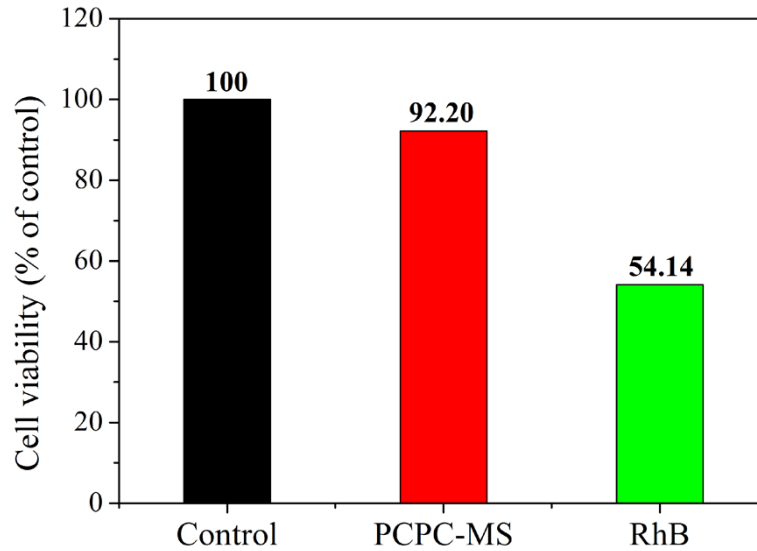

**Fig. S3** Cell viability of NIH-3T3 cells after culturing for 2 days with (a) control group, (b) PCPC-MS, and (c) rhodamine B (RhB).

### **Cytotoxicity tests**

*Cell culture* NIH-3T3 normal cells (a mouse embryonic fibroblast cell line) were cultivated in sterile tissue culture flasks containing Dulbecco's modified Eagle's medium (DMEM: Gibco, Wuxi Trivd Biotechnology Inc., Wuxi, China) supplied with 10% fetal bovine serum (FBS: Hyclone, Wuxi Trivd Biotechnology Inc., Wuxi, China) and 1% penicillin streptomycin (Gibco, Wuxi Trivd Biotechnology Inc., Wuxi, China) at 37 °C in a humidified atmosphere containing 5% CO<sub>2</sub>, and the cells were passaged by trypsinization before confluence. The cells at the third to seventh passage were used in the experiments.

*MTT assay* Before the measurement, the samples were sterilized under ultraviolet (UV) light for 1.5 h. NIH-3T3 cells were seeded into 96-well plates with a density of  $6 \times 10^3$  cells per well in 100  $\mu$ L of medium. After 1 day of incubation, the culture medium was removed and replaced with 20  $\mu$ g/100  $\mu$ L solid samples. The cells were

cultured for another 2 days in a humidified atmosphere with 5% CO<sub>2</sub> at 37 °C. In addition, the cells cultured in wells with DMEM medium were served as control groups in this study. Then, 10 μL of 5 mg mL<sup>-1</sup> MTT assay stock solution in phosphate-buffered saline (PBS) was added to each well of culture plates. After incubating the cells for 4 h, blue formazan crystals were formed and dissolved in 100 μL dimethyl sulfoxide (DMSO) per well. The absorbance was measured with a multimode detector (Tecan Infinite M200 PRO, Shanghai DoBio Biotech Co., Ltd) at a wavelength of 570 nm. The cell viability was calculated by following equation: cell viability (%) = (OD<sub>experimental</sub>/OD<sub>control</sub>)×100%.

Fig. S3 shows the cell viability of NIH-3T3 cells after 2 days of incubation with PCPC-MS and rhodamine B (RhB), a fluorescent small molecule, and the group cultured in DMEM was used as a control. It is clear that the cells cultured with PCPC-MS exhibit much higher viability (92.20% of the control group) compared to that cultured with RhB (54.14% of the control group), indicating the lower cytotoxicity of PCPC-MS.

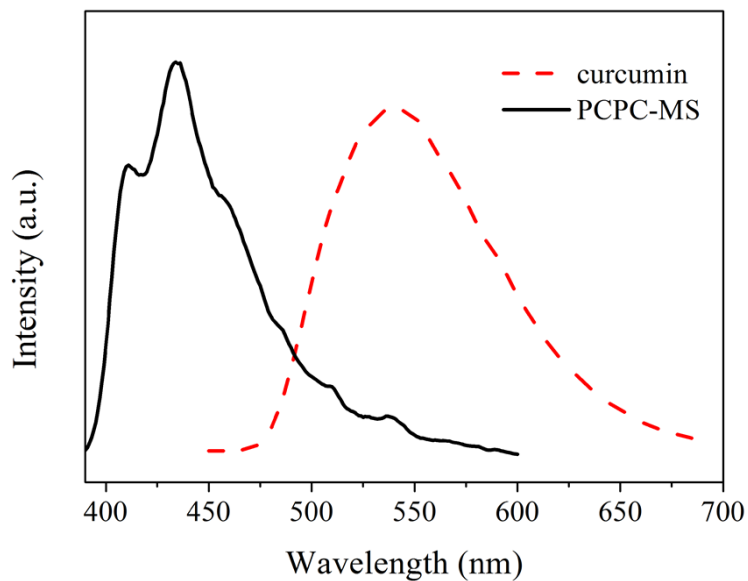

**Fig. S4** Fluorescence emission spectra of curcumin and PCPC-MS in methanol.

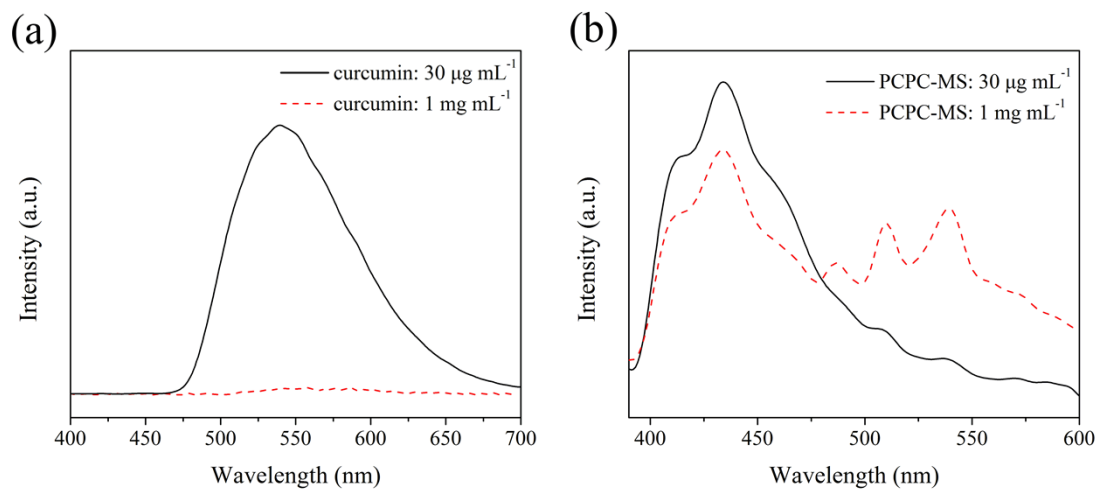

**Fig. S5** Effects of concentration on the fluorescence emission of curcumin (a) and PCPC-MS (b) in methanol.

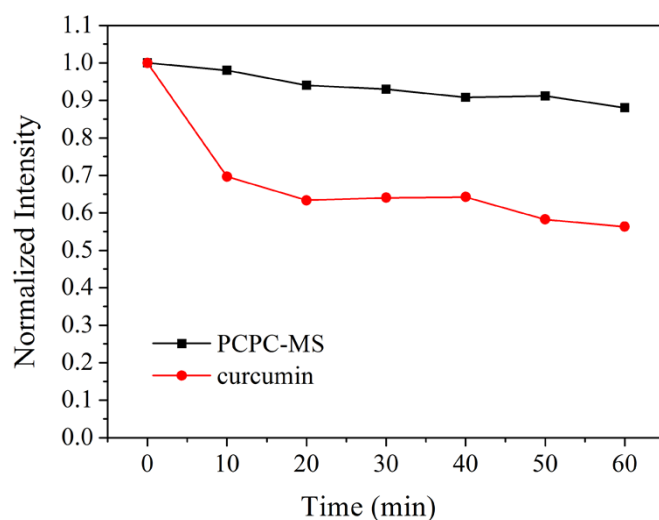

**Fig. S6** Normalized intensity of the fluorescence emission peaks of PCPC-MS and curcumin in methanol *versus* UV irradiation time (372 nm).

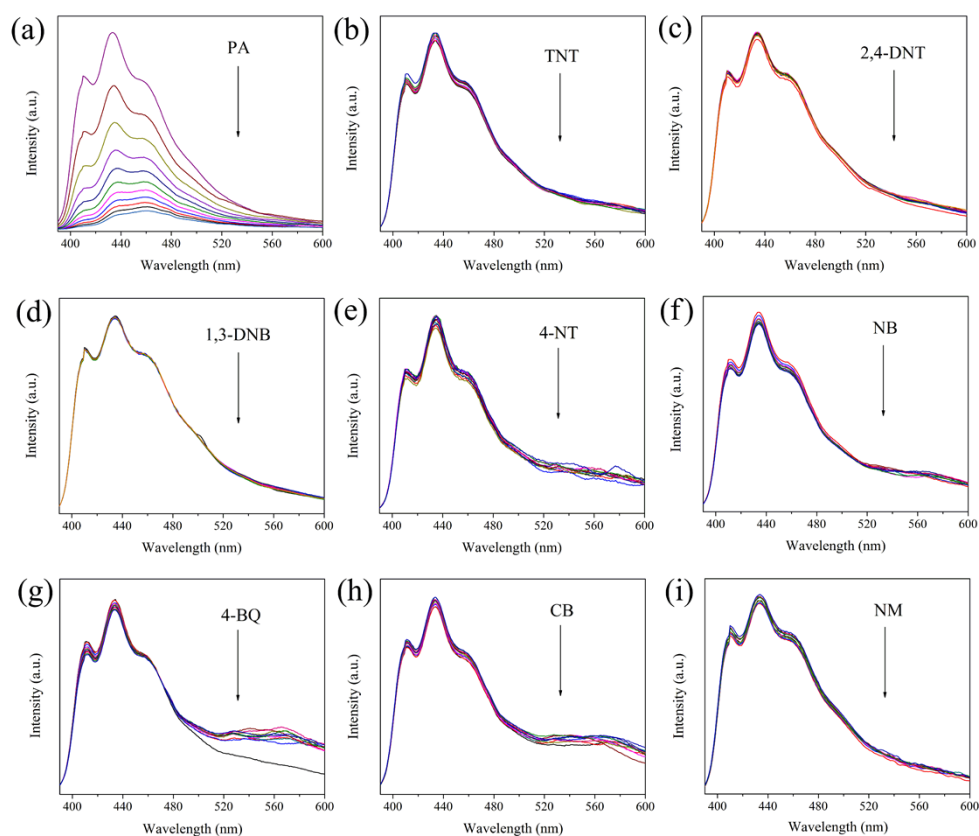

**Fig. S7** Fluorescence emission spectra of PCPC-MS in methanol ( $30 \mu\text{g mL}^{-1}$ ) with the addition of different amounts ( $0\text{-}47.6 \mu\text{g mL}^{-1}$ ) of PA (a), TNT (b), 2,4-DNT (c), 1,3-DNB (d), 4-NT (e), NB (f), 4-BQ (g), CB (h), and NM (i) at room temperature.

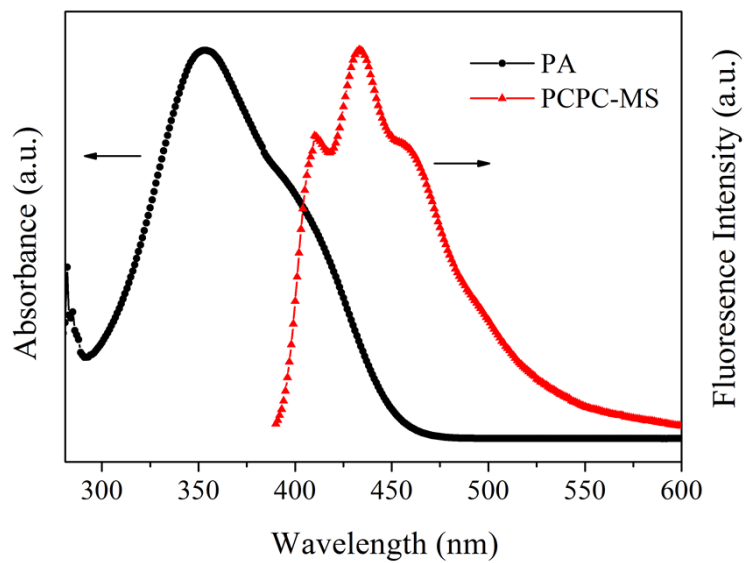

**Fig. S8** Normalized absorption spectrum of PA plotted together with the normalized emission spectrum of PCPC-MS in methanol.

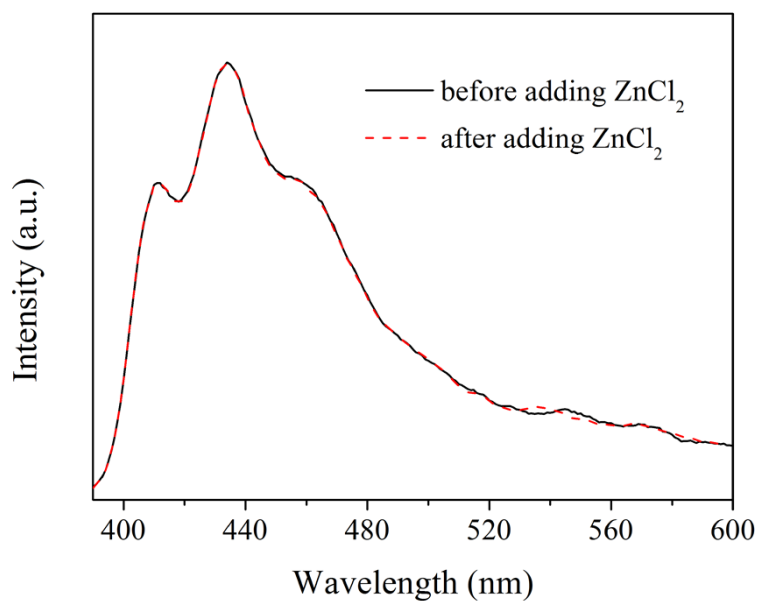

**Fig. S9** Fluorescence emission spectra of PCPC-MS in methanol before and after ZnCl<sub>2</sub> treatment.

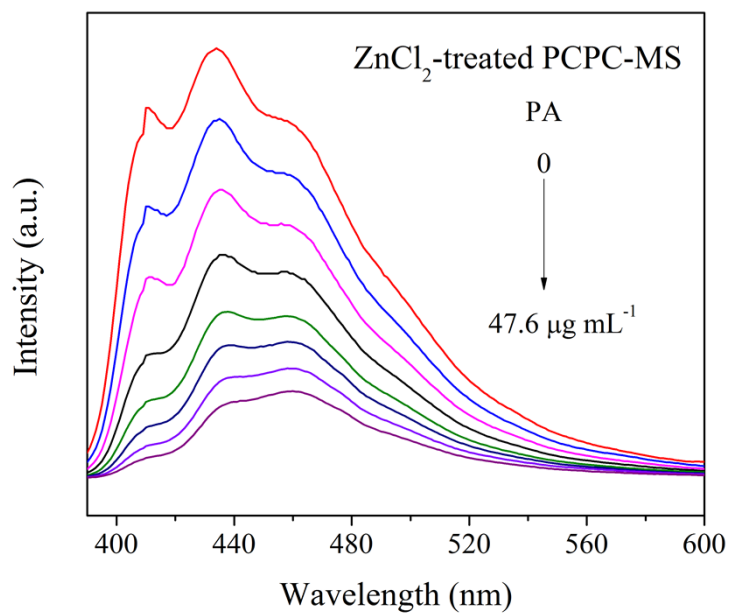

**Fig. S10** Fluorescence spectral response of the  $\text{ZnCl}_2$ -treated PCPC-MS to PA in methanol at room temperature.

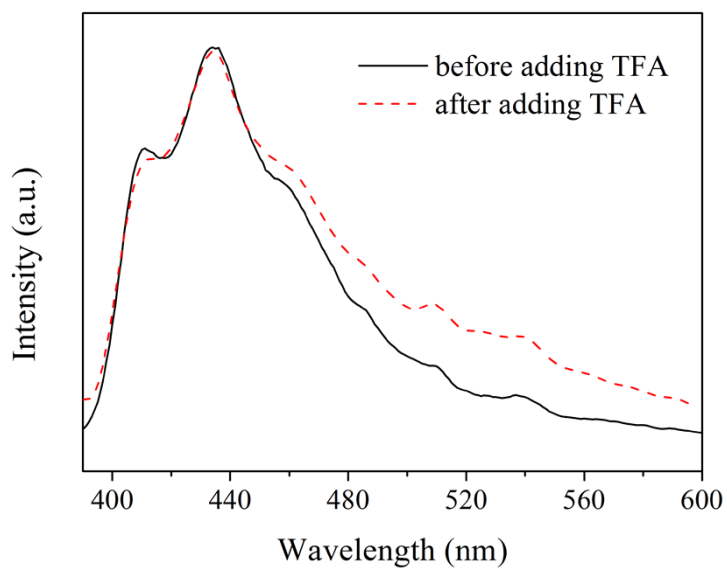

**Fig. S11** Fluorescence emission spectra of PCPC-MS in methanol before and after TFA treatment.



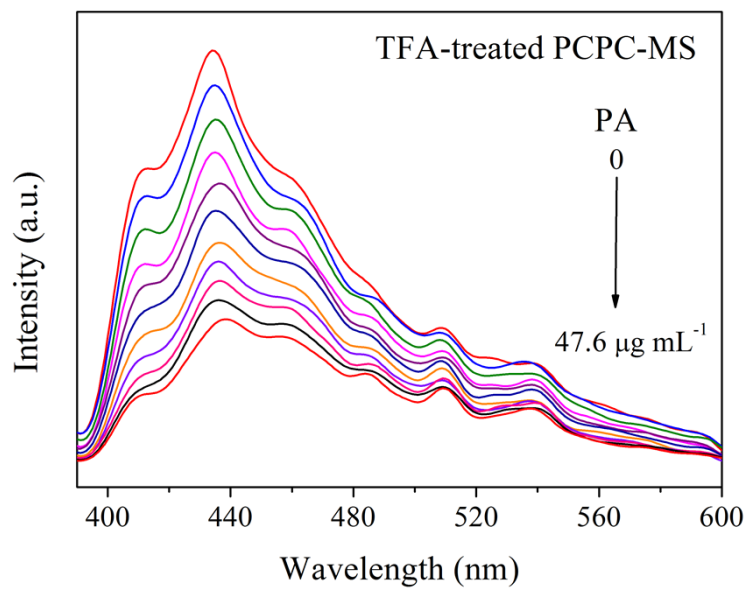

**Fig. S12** Fluorescence spectral response of the TFA-treated PCPC-MS to PA in methanol at room temperature.
